# Supplementary material
Source: PubMed Central journal article supplement (PMC5752872)
Supplement: AEM.01746-17_zam002188234s1.pdf [file AEM.01746-17_zam002188234s1.pdf]

***Staphylococcus edaphicus* sp. nov., isolated in Antarctica, harbours *mecC* gene  
and genomic islands with suspected role in adaptation to extreme environment**

Roman Pantůček, Ivo Sedláček, Adéla Indráková, Veronika Vrbovská, Ivana Mašlaňová,  
Vojtěch Kovařovic, Pavel Švec, Stanislava Králová, Lucie Křištofová, Jana Kekláková,  
Petr Petráš, Jiří Doškař

Supplemental material

**Table S1.** Cellular fatty acid composition (as a percentage of the total) of strains CCM 8730<sup>T</sup>, CCM 8731, *Staphylococcus saprophyticus* subsp. *saprophyticus* CCM 883<sup>T</sup>, *Staphylococcus saprophyticus* subsp. *bovis* CCM 4410<sup>T</sup>, and *Staphylococcus xylosus* CCM 2738<sup>T</sup>. All data were obtained in this study. Values of less than 1% are not shown. All strains were cultivated on TSBA agar plates for 24 h at 28±1°C.

| Fatty acid                        | CCM 8730 <sup>T</sup> | CCM 8731 | CCM 883 <sup>T</sup> | CCM 4410 <sup>T</sup> | CCM 2738 <sup>T</sup> |
|-----------------------------------|-----------------------|----------|----------------------|-----------------------|-----------------------|
| C <sub>13:0</sub> iso             | TR                    | TR       | TR                   | TR                    | 2.2                   |
| C <sub>13:0</sub> anteiso         | ND                    | TR       | ND                   | ND                    | 2.2                   |
| C <sub>14:0</sub> iso             | TR                    | TR       | TR                   | TR                    | 1.4                   |
| C <sub>14:0</sub>                 | TR                    | TR       | TR                   | 1.0                   | 1.3                   |
| C <sub>15:0</sub> iso             | 13.3                  | 13.2     | 13.4                 | 14.8                  | 19.6                  |
| C <sub>15:0</sub> anteiso         | 51.4                  | 51.0     | 52.8                 | 45.6                  | 42.0                  |
| C <sub>16:0</sub> iso             | 1.2                   | 1.2      | 1.2                  | 1.1                   | 1.3                   |
| C <sub>16:0</sub>                 | 2.5                   | 2.6      | 1.4                  | 3.30                  | 2.7                   |
| C <sub>17:0</sub> iso             | 5.6                   | 5.3      | 6.3                  | 6.0                   | 5.8                   |
| C <sub>17:0</sub> anteiso         | 12.9                  | 12.8     | 12.9                 | 9.9                   | 5.9                   |
| C <sub>18:1</sub> ω <sub>9c</sub> | TR                    | TR       | ND                   | ND                    | 1.1                   |
| C <sub>18:0</sub>                 | 3.5                   | 3.7      | 2.4                  | 5.5                   | 4.8                   |
| C <sub>19:0</sub> iso             | 1.2                   | 1.2      | 2.3                  | 1.8                   | 2.0                   |
| C <sub>20:1</sub> ω <sub>9c</sub> | 1.0                   | 1.0      | ND                   | ND                    | 1.6                   |
| C <sub>20:0</sub>                 | 5.2                   | 5.6      | 5.2                  | 8.6                   | 4.9                   |

Legend: TR, trace amounts (< 1%); ND, not detected

**Table S2.** Statistics of the IonTorrent sequencing and assembly of *Staphylococcus edaphicus* CCM 8730T draft genome sequence (GenBank Accession number MRZN00000000).

| <b>Library summary based on predicted per-base quality scores</b> |           |
|-------------------------------------------------------------------|-----------|
| Total Number of Bases [Mbp]                                       | 1,344.76  |
| Number of Q20 Bases [Mbp]                                         | 1,228.63  |
| Total Number of Reads [Count]                                     | 3,973,034 |
| Mean Length [bp]                                                  | 338       |
| Longest Read [bp]                                                 | 745       |
| <b>Assembly statistics</b>                                        |           |
| contigs ( $\geq$ 500 bp) [Count]                                  | 45        |
| contigs ( $\geq$ 1000 bp) [Count]                                 | 38        |
| contigs ( $\geq$ 5000 bp) [Count]                                 | 36        |
| contigs ( $\geq$ 10000 bp) [Count]                                | 36        |
| contigs ( $\geq$ 25000 bp) [Count]                                | 30        |
| contigs ( $\geq$ 50000 bp) [Count]                                | 18        |
| Largest contig [bp]                                               | 275,845   |
| Total length [bp]                                                 | 2,687,658 |
| Total length ( $\geq$ 0 bp) [bp]                                  | 2,692,679 |
| Total length ( $\geq$ 1000 bp) [bp]                               | 2,682,949 |
| Total length ( $\geq$ 5000 bp) [bp]                               | 2,678,026 |
| Total length ( $\geq$ 10000 bp) [bp]                              | 2,678,026 |
| Total length ( $\geq$ 25000 bp) [bp]                              | 2,572,181 |
| Total length ( $\geq$ 50000 bp) [bp]                              | 2,139,734 |
| N50                                                               | 99,210    |
| N75                                                               | 69,093    |
| L50 [count]                                                       | 8         |
| L75 [count]                                                       | 16        |
| GC [%]                                                            | 33.25     |

**Table S3.** Intergenomic distances between the genomes of *Staphylococcus edaphicus* CCM 8730<sup>T</sup> and reference type strains of phylogenetically closest staphylococcal species represented by average nucleotide identity (ANI) and digitally derived genome-to-genome distances (GGD) emulating DNA-DNA hybridization (DDH) values (%).

| Reference genome                                                                      | <i>S. edaphicus</i> CCM 8730 <sup>T</sup> |            |                              | <i>S. saprophyticus</i> ATCC 15305 <sup>T</sup> |                              | <i>S. xylosus</i> CCM 2783 <sup>T</sup> |                              | <i>S. equorum</i> UMC-CNS-924 |                       | <i>S. succinus</i> DSM 14617 <sup>T</sup> |                              | <i>S. gallinarum</i> DSM 20610 <sup>T</sup> |                              |
|---------------------------------------------------------------------------------------|-------------------------------------------|------------|------------------------------|-------------------------------------------------|------------------------------|-----------------------------------------|------------------------------|-------------------------------|-----------------------|-------------------------------------------|------------------------------|---------------------------------------------|------------------------------|
|                                                                                       | ANI (%)                                   | dDDH       |                              | ANI (%)                                         | dDDH                         | ANI (%)                                 | dDDH                         | ANI (%)                       | dDDH                  | ANI (%)                                   | dDDH                         | ANI (%)                                     | dDDH                         |
|                                                                                       | Formula*                                  |            |                              |                                                 |                              |                                         |                              |                               |                       |                                           |                              |                                             |                              |
| <i>S. edaphicus</i> CCM 8730 <sup>T</sup><br>GenBank accession number MRZN000000000   | -                                         | 1          | -                            |                                                 | 63.50% [59.7 - 67.1%]        |                                         | 35.00% [31.7 - 38.6%]        |                               | 30.10% [26.7 - 33.7%] |                                           | 26.00% [22.7 - 29.7%]        |                                             | 21.90% [18.7 - 25.6%]        |
|                                                                                       |                                           | 2 (recom.) | -                            | 84.78                                           | <b>29.00% [26.6 - 31.5%]</b> | 80.37                                   | <b>24.00% [21.7 - 26.4%]</b> | 79.49                         | 22.90% [20.6 - 25.3%] | 78.53                                     | <b>22.20% [19.9 - 24.6%]</b> | 76.9                                        | <b>21.30% [19.1 - 23.8%]</b> |
|                                                                                       |                                           | 3          | -                            |                                                 | 53.00% [49.9 - 56.1%]        |                                         | 31.20% [28.3 - 34.3%]        |                               | 27.30% [24.4 - 30.5%] |                                           | 24.20% [21.3 - 27.3%]        |                                             | 20.90% [18.1 - 23.9%]        |
| <i>S. saprophyticus</i> ATCC 15305 <sup>T</sup><br>GenBank accession number AP008934  | 84.78                                     | 1          | 63.50% [59.7 - 67.1%]        | -                                               | -                            | 80.61                                   | 35.10% [31.7 - 38.6%]        | 79.71                         | 33.90% [30.5 - 37.4%] | 78.72                                     | 28.30% [25 - 32%]            | 77.29                                       | 22.60% [19.4 - 26.3%]        |
|                                                                                       |                                           | 2 (recom.) | <b>29.00% [26.6 - 31.5%]</b> | -                                               | -                            |                                         | <b>24.20% [21.9 - 26.7%]</b> |                               | 23.20% [20.9 - 25.7%] |                                           | <b>22.60% [20.4 - 25.1%]</b> |                                             | <b>21.90% [19.7 - 24.4%]</b> |
|                                                                                       |                                           | 3          | 53.00% [49.9 - 56.1%]        | -                                               | -                            |                                         | 31.30% [28.4 - 34.4%]        |                               | 30.10% [27.2 - 33.2%] |                                           | 26.00% [23.1 - 29.1%]        |                                             | 21.50% [18.7 - 24.6%]        |
| <i>S. xylosus</i> CCM 2783 <sup>T</sup><br>GenBank accession number MRZO000000000     | 80.37                                     | 1          | 35.00% [31.7 - 38.6%]        | 80.61                                           | 35.10% [31.7 - 38.6%]        | -                                       | -                            | 79.78                         | 31.50% [28.1 - 35.1%] | 78.9                                      | 28.10% [24.7 - 31.7%]        | 77.38                                       | 22.50% [19.2 - 26.1%]        |
|                                                                                       |                                           | 2 (recom.) | <b>24.00% [21.7 - 26.4%]</b> |                                                 | <b>24.20% [21.9 - 26.7%]</b> |                                         | -                            |                               | 23.30% [21 - 25.8%]   |                                           | <b>22.70% [20.4 - 25.1%]</b> |                                             | <b>21.70% [19.5 - 24.2%]</b> |
|                                                                                       |                                           | 3          | 31.20% [28.3 - 34.3%]        |                                                 | 31.30% [28.4 - 34.4%]        |                                         | -                            |                               | 28.50% [25.5 - 31.6%] |                                           | 25.80% [22.9 - 28.9%]        |                                             | 21.40% [18.6 - 24.5%]        |
| <i>S. equorum</i> UMC-CNS-924<br>GenBank accession number CP013114                    | 79.49                                     | 1          | 30.10% [26.7 - 33.7%]        | 79.71                                           | 33.90% [30.5 - 37.4%]        | 79.78                                   | 31.50% [28.1 - 35.1%]        | -                             | -                     | 79.86                                     | 32.70% [29.4 - 36.3%]        | 77.445                                      | 22.60% [19.3 - 26.3%]        |
|                                                                                       |                                           | 2 (recom.) | 22.90% [20.6 - 25.3%]        |                                                 | 23.20% [20.9 - 25.7%]        |                                         | 23.30% [21 - 25.8%]          |                               | -                     |                                           | 23.30% [21 - 25.8%]          |                                             | 21.70% [19.4 - 24.1%]        |
|                                                                                       |                                           | 3          | 27.30% [24.4 - 30.5%]        |                                                 | 30.10% [27.2 - 33.2%]        |                                         | 28.50% [25.5 - 31.6%]        |                               | -                     |                                           | 29.40% [26.4 - 32.5%]        |                                             | 21.50% [18.7 - 24.5%]        |
| <i>S. succinus</i> DSM 14617 <sup>T</sup><br>GenBank accession number LCSH000000000   | 78.53                                     | 1          | 26.00% [22.7 - 29.7%]        | 78.72                                           | 28.30% [25 - 32%]            | 78.9                                    | 28.10% [24.7 - 31.7%]        | 79.86                         | 32.70% [29.4 - 36.3%] | -                                         | -                            | 78.19                                       | 25.70% [22.4 - 29.4%]        |
|                                                                                       |                                           | 2 (recom.) | <b>22.20% [19.9 - 24.6%]</b> |                                                 | <b>22.60% [20.4 - 25.1%]</b> |                                         | <b>22.70% [20.4 - 25.1%]</b> |                               | 23.30% [21 - 25.8%]   |                                           | -                            |                                             | <b>22.80% [20.5 - 25.2%]</b> |
|                                                                                       |                                           | 3          | 24.20% [21.3 - 27.3%]        |                                                 | 26.00% [23.1 - 29.1%]        |                                         | 25.80% [22.9 - 28.9%]        |                               | 29.40% [26.4 - 32.5%] |                                           | -                            |                                             | 24.00% [21.2 - 27.1%]        |
| <i>S. gallinarum</i> DSM 20610 <sup>T</sup><br>GenBank accession number JXCF000000000 | 76.9                                      | 1          | 21.90% [18.7 - 25.6%]        | 77.29                                           | 22.60% [19.4 - 26.3%]        | 77.38                                   | 22.50% [19.2 - 26.1%]        | 77.45                         | 22.60% [19.3 - 26.3%] | 78.19                                     | 25.70% [22.4 - 29.4%]        | -                                           | -                            |
|                                                                                       |                                           | 2 (recom.) | <b>21.30% [19.1 - 23.8%]</b> |                                                 | <b>21.90% [19.7 - 24.4%]</b> |                                         | <b>21.70% [19.5 - 24.2%]</b> |                               | 21.70% [19.4 - 24.1%] |                                           | <b>22.80% [20.5 - 25.2%]</b> |                                             | -                            |
|                                                                                       |                                           | 3          | 20.90% [18.1 - 23.9%]        |                                                 | 21.50% [18.7 - 24.6%]        |                                         | 21.40% [18.6 - 24.5%]        |                               | 21.50% [18.7 - 24.5%] |                                           | 24.00% [21.2 - 27.1%]        |                                             | -                            |

Legend: \*, Genome-to-Genome Distance Calculator available at <http://ggdc.dsmz.de/> was used for calculating the digital DDH (dDDH) values with 3 formulas; formula no. 2 is recommended for draft genomes.

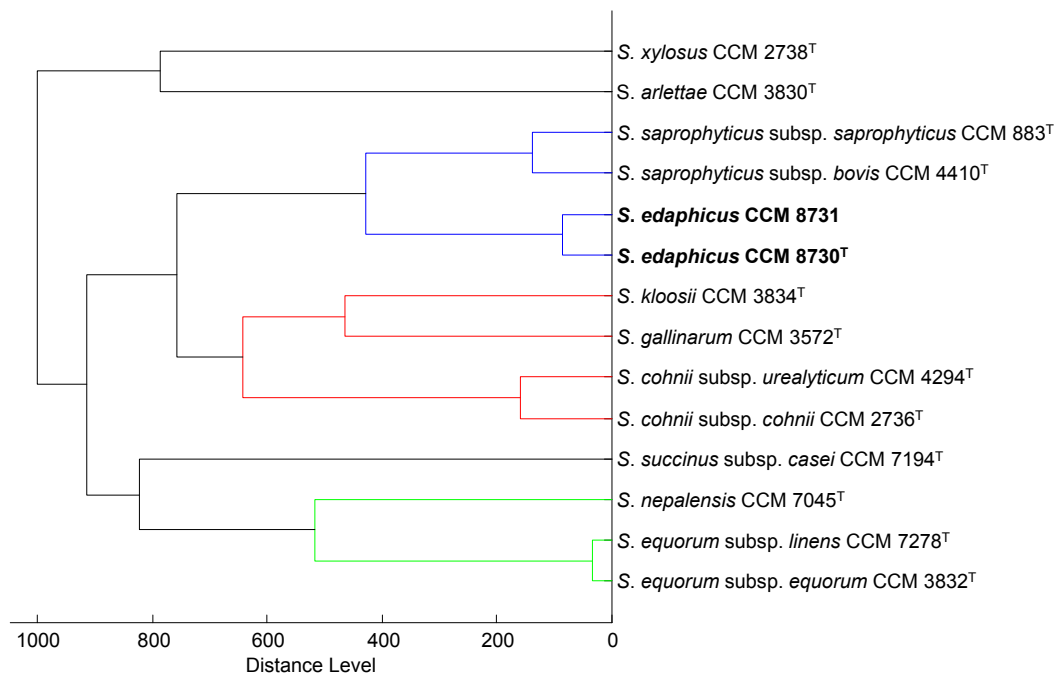

**Fig. S1.** Dendrogram based on MALDI-TOF MS profiles of *Staphylococcus edaphicus* sp. nov. and other phylogenetically related species. The MALDI-TOF MS profiles were acquired using a Microflex instrument (Bruker Daltonik) and the dendrogram was generated using the correlation distance measure with the average linkage algorithm (UPGMA).

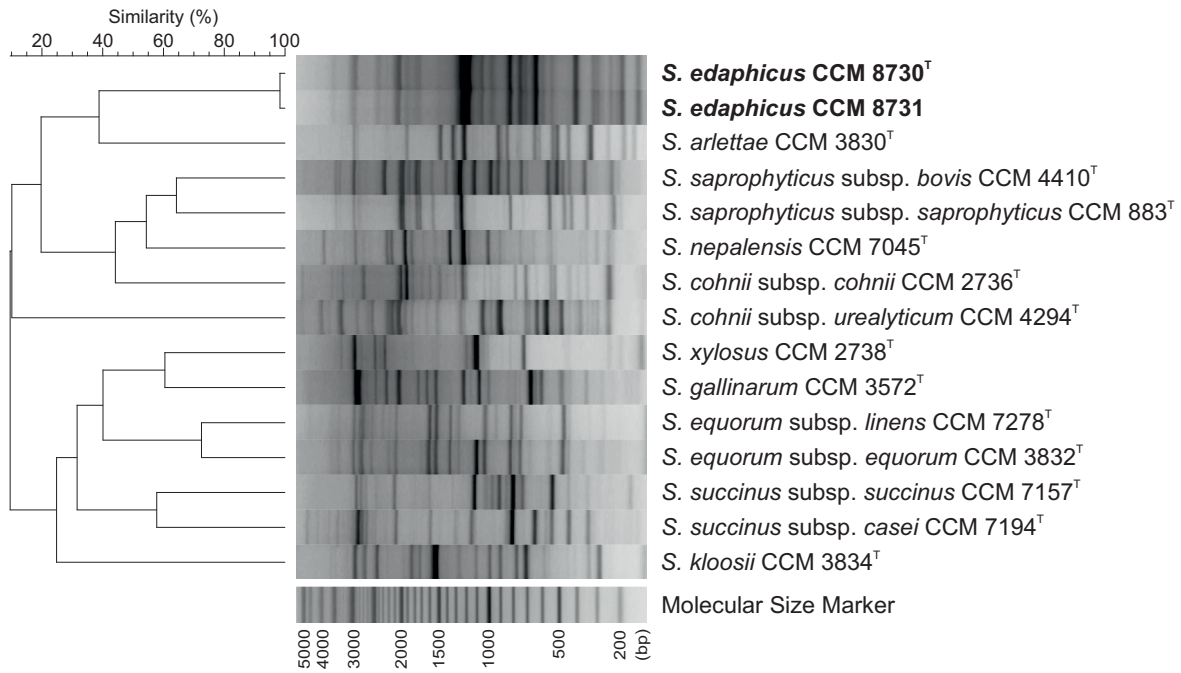

**Fig. S2.** Dendrogram based on cluster analysis of rep-PCR fingerprints obtained with (GTG)<sub>5</sub> primer from novel *Staphylococcus* strains and the type strains of the phylogenetically closely related species. The dendrogram was calculated with Pearson's correlation coefficients with UPGMA clustering method ( $r$ , expressed as percentage similarity values).

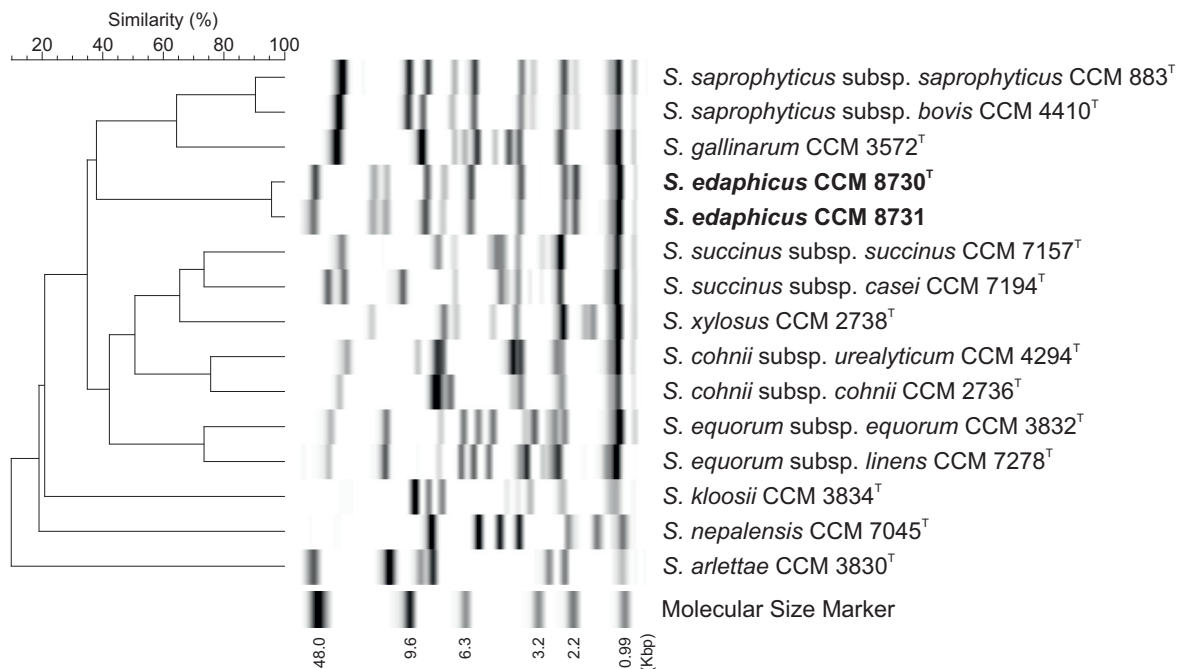

**Fig. S3.** Dendrogram based on cluster analysis of *EcoRI* ribotype patterns obtained using the RiboPrinter system from novel *Staphylococcus* strains and the type strains of phylogenetically closely related species. The dendrogram was calculated with Pearson's correlation coefficients with the UPGMA clustering method ( $r$ , expressed as percentage similarity values).

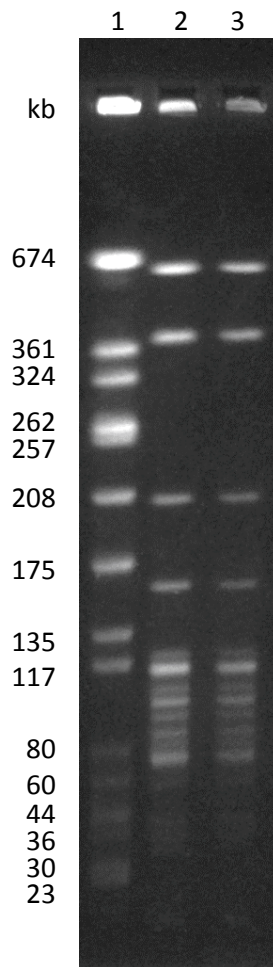

**Fig. S4.** Pulsed-field gel electrophoresis showing identical *Sma*I macrorestriction patterns of *Staphylococcus edaphicus* sp. nov. strains CCM 8730<sup>T</sup> (lane 2) and CCM 8731 (lane 3). *Staphylococcus aureus* NCTC 8325 was used as a size marker (lane 1).
